# Supplementary material
Source: Springer Nature journal article supplement (https://www.springermedizin.de/resource/supplementary/13012_2013_708_MOESM7_ESM.pdf/9630292)
Supplement: MOESM7 [file 9630292]

Self-perceived  
knowledge of  
dementia

(+)

Difficulty of a case

(-)

Number of coaching  
sessions

(+)

Adherence to COTiD

```
graph LR; A[Self-perceived knowledge of dementia] -- (+) --> D[Adherence to COTiD]; B[Difficulty of a case] -- (-) --> D; C[Number of coaching sessions] -- (+) --> D;
```
